# Supplementary figures and images for: The contrasting phylodynamics of human influenza B viruses
Source: eLife journal article supplement (doi:10.7554/elife.05055), 2015-01-16

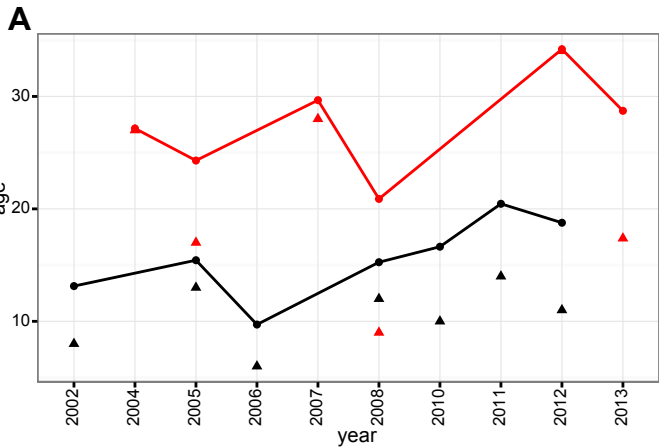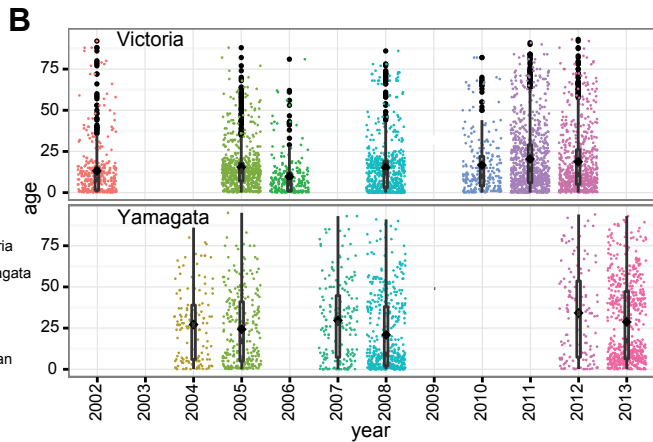

Supplement: supp [file elife_poa_e05055_Figure_10_figure_supplement_1.pdf › elife_poa_e05055_Figure_10_figure_supplement_1.pdf]

**A** Victoria

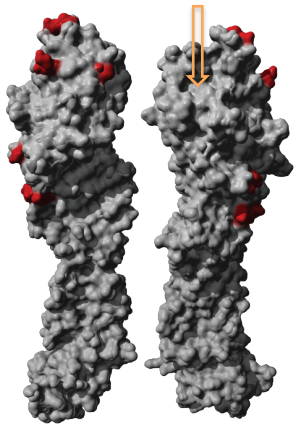

**B** Yamagata

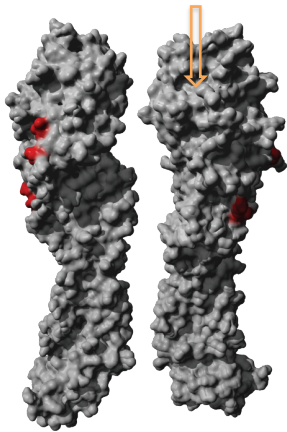

**C** H3N2

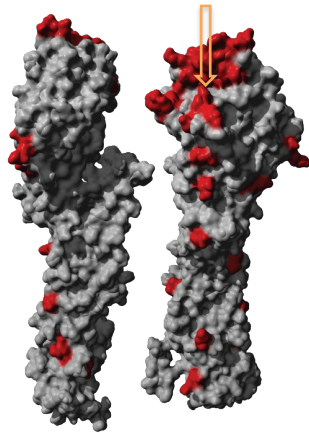

**D** H1N1

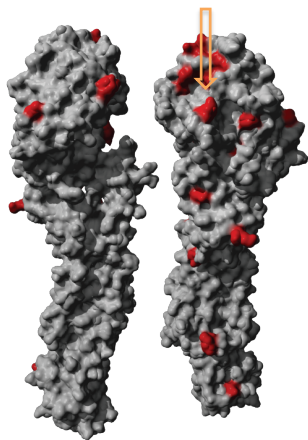

Supplement: supp [file elife_poa_e05055_Figure_11_figure_supplement_1.pdf › elife_poa_e05055_Figure_11_figure_supplement_1.pdf]

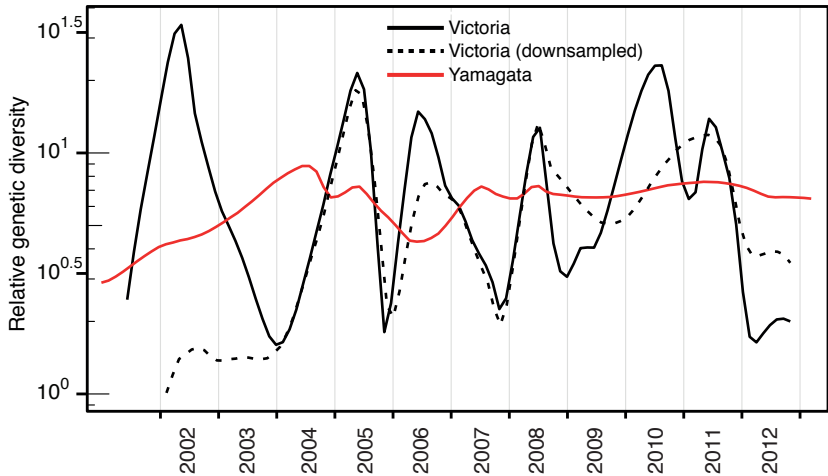

Supplement: supp [file elife_poa_e05055_Figure_3_figure_supplement_1.pdf › elife_poa_e05055_Figure_3_figure_supplement_1.pdf]

**A** Victoria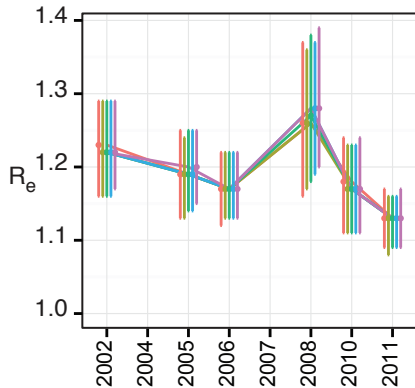**B** Victoria (single cluster)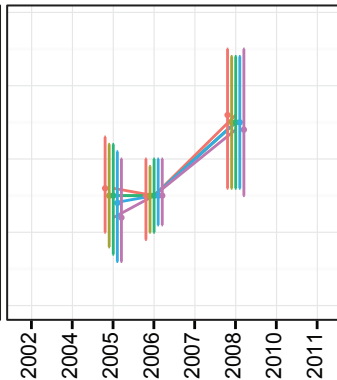**C** Yamagata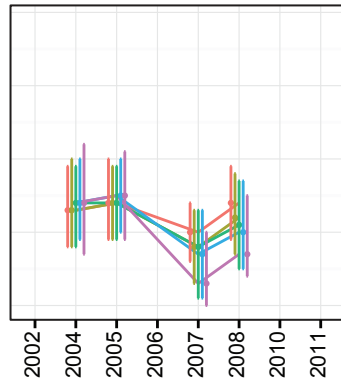 $S_0$ 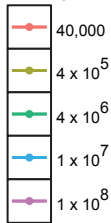

Supplement: supp [file elife_poa_e05055_Figure_5_figure_supplement_1.pdf › elife_poa_e05055_Figure_5_figure_supplement_1.pdf]
